# Supplementary material
Source: ML conference proceedings conference paper supplement (https://openaccess.thecvf.com/content/CVPR2024/html/Zhang_MMVP_A_Multimodal_CVPR_2024_paper.html)
Supplement: Supplementary file 2 [file Zhang_MMVP_A_Multimodal_CVPR_2024_supplemental.zip]

Archive with 2 entries (2 files):
- 1254_supp/1254_supp.mp4
- 1254_supp/1254_supp.pdf
